# Supplementary material for: Outcome Measures in Solid Organ Donor Management Research - a Systematic Review
Source: Research Square preprint supplement (doi:10.21203/rs.3.rs-321188/v2), 2021-04-13
Supplement: Supplementary file 1 [file b210c77cabe9694aca12178c.docx]

**MedLine (OVIDSp)**

#1 exp Organ Donor

#2 exp Organ Donation

#3 exp Kidney Transplantation

#4 #1 OR #2 OR #3

#5 pre-treatment OR pretreatment OR management OR treatment OR intervention OR pre-intervention

#6 intensive care OR critical care OR neuro intensive care OR neuro-intensive care OR neurointensive care OR neurocritical care OR neuro-critical care NITU OR NICU

#7 #5 OR #6

#8 #4 AND #7

#9 RCT OR Randomized Control Trial OR Randomized Controlled Trial OR Randomized Controled Trial OR Randomised Control Trial OR Randomised Controlled Trial Or Randomised Controled Trial

#10 #8 AND #9

**EMBASE (OVIDSp)**

#1 Tissue and Organ Procurement OR Organ Donor OR Deceased Donors OR Deceased Donation OR Donation after brain death OR Donation after neurological death OR brain Death OR Brain Dead Donors OR Heart-beating Donor OR Heart Beating Donor

#2 Kidney donor OR Kidney donation OR Deceased Organ donation OR Kidney Transplant OR Kidney transplantation

#3 #1 AND #2

#4 pre-treatment OR treatment OR pretreatment OR management OR intervention OR pre-intervention

#5 intensive care OR critical care OR neuro intensive care OR neuro-intensive care OR neurointensive care OR neurocritical care OR neuro-critical care NITU OR NICU

#6 #4 OR #5

#7 #3 AND #6

#8 random* OR blind* OR "control group" OR placebo* OR controlled OR groups OR trial*

#9 #7 AND #8

#10 editorial.pt

#11 #9 NOT #10

**PubMed**

#1 Tissue and Organ Procurement OR Organ Donor OR Deceased Donors OR Deceased Donation OR Donation after brain death OR Donation after neurological death OR brain Death OR Brain Dead Donors OR Heart-beating Donor OR Heart Beating Donor

#2 Kidney donor OR Kidney donation OR Deceased Organ donation OR Kidney Transplant OR Kidney transplantation

#3 #1 AND #2

#4 pre-treatment OR treatment OR pretreatment OR management OR intervention OR pre-intervention

#5 intensive care OR critical care OR neuro intensive care OR neuro-intensive care OR neurointensive care OR neurocritical care OR neuro-critical care NITU OR NICU

#6 #4 OR #5

#7 #3 AND #6

#8 random* OR blind* OR "control group" OR placebo* OR controlled OR groups OR trial* OR "systematic review" OR "meta-analysis" OR metaanalysis OR "literature search" OR medline OR pubmed OR cochrane OR) AND (publisher[sb] OR inprocess[sb] OR pubmednotmedline[sb])

#9 #7 AND #8

**Web of Science Conference Proceedings Citation Index (CPCI-S)**

#1 TS=(Tissue and Organ Procurement OR Organ Donor OR Deceased Donors OR Deceased Donation OR Donation after brain death OR Donation after neurological death OR brain Death OR Brain Dead Donors OR Heart-beating Donor OR Heart Beating Donor)

#2 TS= (Kidney donor OR Kidney donation OR Deceased Organ donation OR Deceased Kidney Donation OR Kidney Transplant OR Kidney Transplantation)

#3 TS=(pre-treatment OR treatment OR pretreatment OR management OR intervention)

#4 TS=(randomized OR randomised OR randomly OR controlled trial OR controlled study OR control group OR control groups OR double blind OR blind study OR blind trial)

#1 AND #2 AND #3 AND #4

**CENTRAL**

ID Search

#1 MeSH descriptor: [Tissue and Organ Procurement] explode all trees

#2 MeSH descriptor: [Tissue and Organ Harvesting] explode all trees

#3 MeSH descriptor: [Kidney Transplantation] explode all trees

#4 #1 or #2 or #3

#5 MeSH descriptor: [Tissue Donor] explode all trees

#6 ("deceased donation" or "deceased donor") (Word variations have been searched)

#7 #5 or #6

#8 MeSH descriptor: [Brain Death] explode all trees

#9 #7 and #8

#10 #4 and #9

#11 ("pre-treatment" or "treatment" or "pretreatment" or "management" or “intervention”) (Word variations have been searched)

#12 MeSH descriptor: [Critical Care] explode all trees

#13 MeSH descriptor: [Intensive Care] explode all trees

#14 #12 or #13

#15 #11 or #14

#16 #10 and #15

**Clinicaltrials.gov**

Search terms: organ donor OR brain death AND chronic renal insufficiency OR kidney transplantation AND ESRD OR end stage renal disease with transplant AND donor

Type of Studies: Interventional

**WHO International Clinical Trials Registry**

Title: deceased kidney donor OR organ donation OR kidney donor OR kidney donation

Condition:

Intervention:

Recruitment: ALL
